# Supplementary material
Source: MDPI journal article supplement (https://www.mdpi.com/2073-4441/8/1/17)
Supplement: s1 [file s1]

## Sheet: PB.rdb
Supplementary online material supporting Selbig and others:
The effect of particle size distribution on the design of stormwater control measures
Precipitation and other climatic parameters measured at Pheasant Branch at Middleton monitoring station
U.S. Geological Survey station number 05427948
				15-minte	60-minute	Erosivity	Preceding
		Depth	Duration	precipitation intensity	precipitation intensity	Index	Dry Days	Sine (Time)	Event Volume	Peak Discharge
Start	End	(inches)	(hours)	(inches/hour)	(inches/hour)	(unitless)	(days)	(hours)	(ft3)	(ft3/sec)
1999-10-01 21:55:00	1999-10-02 05:00:00	0.3	7.08333	0.32	0.08	0.396	0	-0.957556	9125.81	2.19409
1999-10-03 13:55:00	1999-10-03 18:00:00	0.19	4.08333	0.2	0.05	0.155	1.37153	0.378583	5779.68	1.37131
1999-10-16 01:55:00	1999-10-16 06:20:00	0.39	4.41667	0.64	0.2	1.437	12.3299	0.316364	11863.5	4.38818
1999-11-10 15:55:00	1999-11-10 19:00:00	0.26	3.08333	0.44	0.11	0.517	25.3993	0.697918	7909.03	3.01687
1999-11-23 01:55:00	1999-11-23 12:05:00	0.77	10.1667	0.48	0.15	1.429	12.2882	0.583297	23422.9	3.29113
2000-03-09 03:55:00	2000-03-09 10:00:00	0.25	6.08333	0.6	0.15	0.668	106.66	0.778307	7604.84	4.11392
2000-03-15 12:55:00	2000-03-15 15:00:00	0.15	2.08333	0.36	0.09	0.233	6.12153	0.832597	4562.9	2.46835
2000-03-19 12:55:00	2000-03-20 18:00:00	0.32	29.0833	0.28	0.07	0.341	3.91319	-0.963399	9734.19	1.91983
2000-03-26 16:55:00	2000-03-26 19:00:00	0.1	2.08333	0.28	0.07	0.12	5.95486	-0.404035	3041.94	1.91983
2000-04-08 09:55:00	2000-04-08 13:00:00	0.15	3.08333	0.36	0.09	0.237	12.6215	-0.270547	4562.9	2.46835
2000-04-19 07:55:00	2000-04-20 03:05:00	1.34	19.1667	1.12	0.57	10.167	10.7882	-0.938385	40761.9	7.67931
2000-04-20 09:05:00	2000-04-21 00:45:00	0.26	15.6667	0.16	0.08	0.161	0.25	-0.767578	7909.03	1.09704
2000-04-23 00:55:00	2000-04-23 12:10:00	0.63	11.25	0.4	0.22	1.111	2.00694	0.977216	19164.2	2.74261
2000-04-28 15:55:00	2000-04-28 23:00:00	0.11	7.08333	0.24	0.06	0.104	5.15625	0.902906	3346.13	1.64557
2000-05-08 08:30:00	2000-05-08 09:50:00	0.19	1.33333	0.6	0.18	0.556	9.39583	-0.984179	5779.68	4.11392
2000-05-08 17:40:00	2000-05-08 18:05:00	0.19	0.416667	0.56	0	0.5	0.326389	-0.979299	5779.68	3.83965
2000-05-09 10:30:00	2000-05-09 14:05:00	0.18	3.58333	0.16	0.1	0.137	0.684028	-0.617517	5475.48	1.09704
2000-05-11 22:55:00	2000-05-12 09:20:00	0.3	10.4167	0.52	0.27	1.195	2.36806	0.960783	9125.81	3.56539
2000-05-17 13:10:00	2000-05-18 22:45:00	4.28	33.5833	2.4	1.09	44.238	5.15972	0.917737	130195	16.4557
2000-05-26 22:45:00	2000-05-27 06:40:00	0.66	7.91667	0.32	0.2	1.066	8	-0.907323	20076.8	2.19409
2000-05-27 21:15:00	2000-05-28 08:50:00	0.5	11.5833	0.72	0.25	1.613	0.607639	-0.875863	15209.7	4.9367
2000-05-30 06:35:00	2000-05-30 09:10:00	0.33	2.58333	0.52	0.21	0.807	1.90625	0.969128	10038.4	3.56539
2000-05-30 22:50:00	2000-06-01 08:55:00	3.4	34.0833	2.52	0.89	47.143	0.569444	0.909817	103426	17.2784
2000-06-01 18:15:00	2000-06-01 21:10:00	2.39	2.91667	5.48	2.25	61.978	0.388889	-0.617992	72702.3	37.5738
2000-06-04 06:55:00	2000-06-05 06:35:00	0.95	23.6667	0.28	0.21	1.462	2.40625	0.0523472	28898.4	1.91983
2000-06-12 06:10:00	2000-06-12 08:10:00	0.11	2	0.2	0.09	0.1	6.98264	0.986065	3346.13	1.37131
2000-06-13 15:40:00	2000-06-14 01:10:00	3.34	9.5	3.8	1.89	80.176	1.3125	0.00782342	101601	26.0548
2000-06-14 12:35:00	2000-06-14 18:05:00	0.2	5.5	0.36	0.12	0.363	0.475694	-0.760254	6083.87	2.46835
2000-06-16 00:05:00	2000-06-16 05:45:00	0.19	5.66667	0.28	0.11	0.255	1.25	-0.716465	5779.68	1.91983
2000-06-20 04:45:00	2000-06-20 07:25:00	0.85	2.66667	1.32	0.53	6.609	3.95833	-0.251404	25856.5	9.05061
2000-06-24 13:55:00	2000-06-24 19:05:00	0.57	5.16667	1.04	0.42	3.054	4.27083	0.997089	17339	7.13079
2000-06-28 07:15:00	2000-06-28 10:35:00	0.18	3.33333	0.16	0.09	0.163	3.50694	-0.875506	5475.48	1.09704
2000-07-02 19:35:00	2000-07-02 21:40:00	0.66	2.08333	1.36	0.53	5.038	4.375	-0.30107	20076.8	9.32487
2000-07-09 07:55:00	2000-07-09 10:15:00	0.25	2.33333	0.24	0.18	0.33	6.42708	-0.511147	7604.84	1.64557
2000-07-10 03:45:00	2000-07-10 07:25:00	0.8	3.66667	0.68	0.39	2.892	0.729167	-0.978469	24335.5	4.66244
2000-08-01 06:45:00	2000-08-01 08:05:00	0.71	1.33333	1.36	0.65	6.475	21.9722	0.99726	21597.7	9.32487
2000-08-05 11:25:00	2000-08-06 00:40:00	2.03	13.25	3.76	1.61	47.706	4.13889	-0.558007	61751.3	25.7805
2000-08-07 13:35:00	2000-08-07 14:15:00	1.17	0.666667	2.24	0	25.923	1.53819	0.997373	35590.6	15.3586
2000-08-08 14:05:00	2000-08-08 14:45:00	2.87	0.666667	8	0	75.515	0.993056	0.583038	87303.6	54.8522
2000-08-12 19:40:00	2000-08-12 21:10:00	0.12	1.5	0.16	0.1	0.111	4.20486	0.451622	3650.32	1.09704
2000-08-16 20:25:00	2000-08-17 09:30:00	0.99	13.0833	0.88	0.51	5.411	3.96875	-0.977495	30115.2	6.03374
2000-08-26 07:40:00	2000-08-26 10:10:00	1.28	2.5	2.84	1.1	25.301	8.92361	0.985823	38936.8	19.4725
2000-09-03 07:30:00	2000-09-03 08:40:00	0.37	1.16667	1.04	0.36	1.824	7.88889	0.029506	11255.2	7.13079
2000-09-11 08:05:00	2000-09-11 10:30:00	1.47	2.41667	2.36	0.89	19.787	7.97569	-0.990102	44716.5	16.1814
2000-09-11 16:45:00	2000-09-11 22:10:00	0.29	5.41667	0.56	0.17	0.723	0.260417	-0.876658	8821.61	3.83965
2000-09-14 00:20:00	2000-09-14 06:55:00	0.25	6.58333	0.4	0.15	0.488	2.09028	0.948066	7604.84	2.74261
2000-09-19 15:25:00	2000-09-20 06:55:00	0.43	15.5	0.2	0.12	0.498	5.35417	0.558343	13080.3	1.37131
2000-09-22 09:50:00	2000-09-23 03:50:00	0.91	18	0.64	0.22	2.268	2.12153	-0.21643	27681.6	4.38818
2000-10-03 19:35:00	2000-10-03 23:00:00	0.19	3.41667	0.16	0.08	0.142	10.6562	0.808715	5779.68	1.09704
2000-10-05 15:55:00	2000-10-05 22:00:00	0.2	6.08333	0.16	0.1	0.174	1.70486	-0.786584	6083.87	1.09704
2000-10-23 09:35:00	2000-10-23 13:05:00	0.2	3.5	0.12	0.09	0.122	17.4826	0.206687	6083.87	0.822783
2000-11-06 13:15:00	2000-11-07 00:40:00	0.88	11.4167	0.2	0.16	1.023	14.0069	-0.981514	26769	1.37131
2000-11-09 13:55:00	2000-11-09 15:55:00	0.11	2	0.2	0.07	0.085	2.55208	0.953428	3346.13	1.37131
2000-11-16 03:10:00	2000-11-16 15:15:00	0.3	12.0833	0.12	0.09	0.183	6.46875	0.999297	9125.81	0.822783
2000-11-28 20:45:00	2000-11-29 11:00:00	0.18	14.25	0.08	0.04	0.044	12.2292	0.99172	5475.48	0.548522
2001-03-12 08:05:00	2001-03-12 11:05:00	0.16	3	0.12	0.1	0.117	15.1458	-0.997441	4867.1	0.822783
2001-03-31 14:25:00	2001-03-31 19:35:00	0.23	5.16667	0.12	0.07	0.143	19.1389	-0.941826	6996.45	0.822783
2001-04-05 13:25:00	2001-04-05 23:40:00	0.44	10.25	0.56	0.21	1.426	4.74306	-0.555295	13384.5	3.83965
2001-04-08 23:20:00	2001-04-09 04:45:00	0.91	5.41667	0.36	0.27	1.895	2.98611	0.758051	27681.6	2.46835
2001-04-10 23:55:00	2001-04-11 18:55:00	0.48	19	0.48	0.19	0.974	1.79861	0.25415	14601.3	3.29113
2001-04-20 02:20:00	2001-04-20 06:35:00	0.47	4.25	0.44	0.26	1.096	8.30903	-0.548903	14297.1	3.01687
2001-04-21 00:20:00	2001-04-21 05:05:00	0.51	4.75	1	0.4	2.215	0.739583	0.32935	15513.9	6.85653
2001-05-03 01:55:00	2001-05-03 03:35:00	0.19	1.66667	0.52	0.16	0.45	11.8681	-0.164039	5779.68	3.56539
2001-05-03 18:40:00	2001-05-04 06:40:00	0.42	12	0.4	0.19	0.855	0.628472	0.508234	12776.1	2.74261
2001-05-07 00:20:00	2001-05-07 11:30:00	0.25	11.1667	0.12	0.08	0.183	2.73611	-0.587246	7604.84	0.822783
2001-05-10 01:10:00	2001-05-10 02:20:00	0.17	1.16667	0.28	0.16	0.28	2.56944	0.497558	5171.29	1.91983
2001-05-10 19:45:00	2001-05-11 03:45:00	0.56	8	0.96	0.38	2.715	0.725694	0.962232	17034.8	6.58226
2001-05-21 00:25:00	2001-05-21 14:50:00	1.66	14.4167	1.4	0.68	16.014	9.86111	-0.880464	50496.1	9.59914
2001-05-23 01:45:00	2001-05-23 14:35:00	0.38	12.8333	0.44	0.19	0.825	1.45486	0.829782	11559.4	3.01687
2001-05-31 15:35:00	2001-06-01 04:30:00	0.46	12.9167	0.12	0.08	0.281	8.04167	-0.129958	13992.9	0.822783
2001-06-01 18:35:00	2001-06-01 21:25:00	0.41	2.83333	0.48	0.25	1.017	0.586806	-0.950651	12471.9	3.29113
2001-06-05 03:40:00	2001-06-05 13:00:00	0.73	9.33333	0.64	0.39	2.738	3.26042	0.996913	22206.1	4.38818
2001-06-11 22:05:00	2001-06-12 04:40:00	2.4	6.58333	2.16	1.52	43.33	6.37847	0.918871	73006.5	14.8101
2001-06-14 15:05:00	2001-06-14 20:35:00	1.38	5.5	1.28	0.94	13.862	2.43403	-0.999617	41978.7	8.77635
2001-06-15 06:00:00	2001-06-15 20:55:00	0.21	14.9167	0.04	0.03	0.051	0.392361	-0.82879	6388.06	0.274261
2001-07-17 07:55:00	2001-07-17 09:50:00	0.65	1.91667	1.64	0.59	5.908	31.4583	-0.307921	19772.6	11.2447
2001-07-24 20:40:00	2001-07-25 03:35:00	0.29	6.91667	0.2	0.12	0.305	7.45139	0.804633	8821.61	1.37131
2001-08-01 18:15:00	2001-08-02 09:10:00	6.36	14.9167	2.92	1.53	138.298	7.61111	0.556706	193467	20.0211
2001-08-09 17:15:00	2001-08-09 17:35:00	0.12	0.333333	0.44	0	0.4	7.33681	-0.884179	3650.32	3.01687
2001-08-12 22:00:00	2001-08-12 23:05:00	0.14	1.08333	0.52	0.13	0.303	3.18403	0.909074	4258.71	3.56539
2001-08-15 17:40:00	2001-08-16 09:55:00	0.32	16.25	0.16	0.08	0.237	2.77431	-0.730401	9734.19	1.09704
2001-08-22 07:10:00	2001-08-22 14:05:00	0.34	6.91667	0.36	0.19	0.595	5.88542	-0.8904	10342.6	2.46835
2001-08-24 19:25:00	2001-08-25 20:55:00	1.51	25.5	2.56	0.85	22.734	2.22222	0.450252	45933.2	17.5527
2001-09-07 19:15:00	2001-09-08 06:35:00	1.21	11.3333	2.36	0.65	14.74	12.9306	0.948308	36807.4	16.1814
2001-09-09 06:35:00	2001-09-09 20:55:00	0.59	14.3333	0.2	0.16	0.663	1	-0.222485	17947.4	1.37131
2001-09-17 05:35:00	2001-09-17 12:20:00	0.43	6.75	0.2	0.17	0.546	7.36111	-0.946458	13080.3	1.37131
2001-09-18 23:40:00	2001-09-19 11:35:00	0.89	11.9167	0.2	0.14	1.008	1.47222	0.48939	27073.2	1.37131
2001-09-20 20:05:00	2001-09-21 06:20:00	0.33	10.25	0.4	0.2	0.568	1.35417	0.70293	10038.4	2.74261
2001-09-22 22:55:00	2001-09-23 14:45:00	1.83	15.8333	0.68	0.48	7.916	1.69097	-0.973151	55667.4	4.66244
2001-10-10 02:30:00	2001-10-10 10:35:00	0.11	8.08333	0.2	0.06	0.085	16.4896	0.353868	3346.13	1.37131
2001-10-13 10:00:00	2001-10-13 20:50:00	0.22	10.8333	0.12	0.07	0.134	2.97569	-0.18964	6692.26	0.822783
2001-10-22 14:35:00	2001-10-22 22:30:00	1.78	7.91667	1.2	0.74	12.778	8.73958	0.411958	54146.5	8.22783
2001-10-24 08:00:00	2001-10-24 14:40:00	0.23	6.66667	0.16	0.14	0.234	1.39583	-0.96385	6996.45	1.09704
2001-11-13 05:45:00	2001-11-13 10:35:00	0.18	4.83333	0.12	0.07	0.09	19.6285	-0.70598	5475.48	0.822783
2001-11-18 18:00:00	2001-11-19 02:50:00	0.25	8.83333	0.12	0.07	0.124	5.30903	-0.999899	7604.84	0.822783
2001-11-23 18:25:00	2001-11-24 11:05:00	0.88	16.6667	0.48	0.18	1.449	4.64931	-0.313801	26769	3.29113
2001-11-24 17:40:00	2001-11-25 00:45:00	0.21	7.08333	0.56	0.17	0.514	0.274306	-0.960263	6388.06	3.83965
2001-11-26 17:25:00	2001-11-27 05:45:00	0.16	12.3333	0.12	0.07	0.098	1.69444	0.135516	4867.1	0.822783
2001-11-29 23:10:00	2001-11-30 07:15:00	0.24	8.08333	0.12	0.1	0.176	2.72569	-0.231798	7300.65	0.822783
2002-03-08 00:30:00	2002-03-08 06:55:00	0.19	6.41667	0.16	0.08	0.195	15.2569	0.783394	5779.68	1.09704
2002-03-08 16:55:00	2002-03-09 09:55:00	0.18	17	0.2	0.09	0.186	0.416667	0.999911	5475.48	1.37131
2002-03-19 18:25:00	2002-03-20 00:05:00	0.17	5.66667	0.08	0.08	0.083	10.3542	0.0801797	5171.29	0.548522
2002-04-02 12:30:00	2002-04-02 16:55:00	0.27	4.41667	0.12	0.11	0.198	13.5174	0.954318	8213.23	0.822783
2002-04-07 03:50:00	2002-04-08 01:00:00	0.76	21.1667	0.24	0.16	0.965	4.45486	-0.368067	23118.7	1.64557
2002-04-08 11:30:00	2002-04-09 00:35:00	0.66	13.0833	0.12	0.11	0.484	0.4375	0.809039	20076.8	0.822783
2002-04-12 00:40:00	2002-04-12 02:30:00	0.16	1.83333	0.2	0.12	0.166	3.00347	-0.975621	4867.1	1.37131
2002-04-14 18:25:00	2002-04-14 19:40:00	0.11	1.25	0.36	0.1	0.147	2.66319	0.811973	3346.13	2.46835
2002-04-18 16:10:00	2002-04-18 23:35:00	0.49	7.41667	1	0.39	2.92	3.85417	-0.990022	14905.5	6.85653
2002-04-21 10:05:00	2002-04-22 01:25:00	0.3	15.3333	0.2	0.08	0.187	2.4375	0.967996	9125.81	1.37131
2002-04-24 13:15:00	2002-04-24 15:30:00	0.18	2.25	0.24	0.16	0.24	2.49306	-0.965529	5475.48	1.64557
2002-04-27 11:35:00	2002-04-28 06:00:00	0.62	18.4167	0.24	0.13	0.712	2.83681	0.889583	18860	1.64557
2002-05-01 12:30:00	2002-05-02 01:30:00	0.48	13	0.2	0.15	0.489	3.27083	-0.912174	14601.3	1.37131
2002-05-08 23:35:00	2002-05-09 05:20:00	0.4	5.75	0.48	0.24	1.033	6.92014	0.0300566	12167.7	3.29113
2002-05-11 10:55:00	2002-05-12 05:40:00	0.82	18.75	0.52	0.27	2.139	2.23264	0.596641	24943.9	3.56539
2002-05-25 05:00:00	2002-05-25 11:25:00	0.72	6.41667	0.32	0.23	1.231	12.9722	-0.520804	21901.9	2.19409
2002-05-28 21:15:00	2002-05-29 03:05:00	0.4	5.83333	0.72	0.24	1.242	3.40972	0.8835	12167.7	4.9367
2002-06-02 16:30:00	2002-06-02 18:35:00	0.17	2.08333	0.2	0.15	0.224	4.55903	-0.387409	5171.29	1.37131
2002-06-03 01:55:00	2002-06-03 08:20:00	1.33	6.41667	1.96	0.81	18.761	0.305556	-0.00545781	40457.7	13.4388
2002-06-03 22:55:00	2002-06-04 13:30:00	1.31	14.5833	0.36	0.25	2.812	0.607639	0.764034	39849.4	2.46835
2002-06-10 19:00:00	2002-06-10 20:30:00	0.12	1.5	0.16	0.1	0.105	6.22917	0.989122	3650.32	1.09704
2002-06-11 02:50:00	2002-06-11 08:15:00	0.13	5.41667	0.28	0.08	0.125	0.263889	0.984066	3954.52	1.91983
2002-06-13 16:40:00	2002-06-13 23:20:00	0.4	6.66667	1.08	0.38	2.163	2.35069	-0.926253	12167.7	7.40505
2002-06-26 04:00:00	2002-06-26 09:40:00	0.38	5.66667	0.96	0.26	1.585	12.1944	-0.886719	11559.4	6.58226
2002-07-08 19:05:00	2002-07-08 20:55:00	0.13	1.83333	0.44	0.12	0.259	12.3924	-0.913701	3954.52	3.01687
2002-07-20 15:25:00	2002-07-20 17:05:00	0.28	1.66667	0.64	0.27	1.135	11.7708	-0.419734	8517.42	4.38818
2002-07-22 00:50:00	2002-07-22 08:00:00	0.57	7.16667	0.96	0.31	2.359	1.32292	-0.967735	17339	6.58226
2002-07-27 06:10:00	2002-07-27 10:45:00	0.13	4.58333	0.08	0.05	0.048	4.92361	-0.692213	3954.52	0.548522
2002-07-27 23:10:00	2002-07-27 23:25:00	0.15	0.25	0.6	0	0.5	0.517361	-0.99521	4562.9	4.11392
2002-08-04 02:35:00	2002-08-04 16:35:00	0.51	14	0.64	0.21	1.548	7.13194	-0.723965	15513.9	4.38818
2002-08-11 17:00:00	2002-08-11 19:40:00	1.27	2.66667	2.2	1.16	19.798	7.01736	0.48641	38632.6	15.0844
2002-08-12 20:15:00	2002-08-13 06:50:00	0.63	10.5833	0.84	0.24	2.197	1.02431	0.997366	19164.2	5.75948
2002-08-17 06:55:00	2002-08-17 07:50:00	0.2	0.916667	0.6	0	0.622	4.00347	-0.194108	6083.87	4.11392
2002-08-21 18:15:00	2002-08-21 21:20:00	1.18	3.08333	2.92	1.06	24.603	4.43403	-0.906653	35894.8	20.0211
2002-08-22 03:55:00	2002-08-22 09:20:00	0.38	5.41667	0.44	0.21	0.788	0.274306	-0.999464	11559.4	3.01687
2002-09-02 03:55:00	2002-09-02 08:40:00	0.94	4.75	1.24	0.39	4.974	10.7743	0.0283077	28594.2	8.50209
2002-09-19 00:55:00	2002-09-19 09:25:00	0.55	8.5	0.64	0.25	1.559	16.6771	0.9081	16730.6	4.38818
2002-09-28 21:55:00	2002-09-29 05:50:00	0.78	7.91667	1.24	0.36	4.593	9.52083	-0.999835	23727.1	8.50209
2002-10-01 18:50:00	2002-10-03 04:35:00	0.49	33.75	0.24	0.1	0.438	2.54167	0.968437	14905.5	1.64557
2002-10-03 20:55:00	2002-10-04 13:25:00	1.85	16.5	1.4	1.1	19.143	0.680556	-0.261036	56275.8	9.59914
2002-10-18 03:35:00	2002-10-18 10:35:00	0.16	7	0.08	0.06	0.078	13.5903	-0.919218	4867.1	0.548522
2002-10-24 23:35:00	2002-10-26 00:10:00	0.42	24.5833	0.08	0.05	0.205	6.54167	-0.577728	12776.1	0.548522
2002-11-10 23:15:00	2002-11-11 08:45:00	0.36	9.5	0.24	0.09	0.363	15.9618	-0.614858	10951	1.64557
2002-11-18 15:10:00	2002-11-18 23:20:00	0.16	8.16667	0.08	0.05	0.078	7.26736	-0.890925	4867.1	0.548522
2003-03-19 13:20:00	2003-03-19 18:25:00	0.23	5.08333	0.24	0.1	0.236	47.0069	0.429295	6996.45	1.64557
2003-03-27 23:40:00	2003-03-28 17:20:00	0.49	17.6667	0.16	0.11	0.425	8.21875	0.523122	14905.5	1.09704
2003-04-03 23:15:00	2003-04-04 00:15:00	0.12	1	0.28	0.12	0.15	6.24653	-0.148394	3650.32	1.91983
2003-04-05 10:50:00	2003-04-05 12:50:00	0.11	2	0.12	0.07	0.054	1.44097	-0.998153	3346.13	0.822783
2003-04-19 14:50:00	2003-04-20 07:45:00	0.29	16.9167	0.16	0.13	0.296	14.0833	0.0901633	8821.61	1.09704
2003-04-30 05:35:00	2003-04-30 13:15:00	0.76	7.66667	0.6	0.33	2.378	9.90972	-0.958042	23118.7	4.11392
2003-04-30 20:30:00	2003-05-01 08:25:00	1.54	11.9167	2.2	0.81	19.475	0.302083	-0.945775	46845.8	15.0844
2003-05-04 19:15:00	2003-05-05 08:35:00	0.67	13.3333	0.28	0.19	0.979	3.45139	0.420185	20381	1.91983
2003-05-07 03:10:00	2003-05-07 09:30:00	0.42	6.33333	0.32	0.2	0.849	1.77431	-0.947518	12776.1	2.19409
2003-05-08 22:20:00	2003-05-09 02:25:00	0.56	4.08333	0.32	0.24	1.085	1.53472	0.525438	17034.8	2.19409
2003-05-10 20:10:00	2003-05-11 01:10:00	0.61	5	0.96	0.35	3.439	1.73958	0.627735	18555.8	6.58226
2003-05-11 09:05:00	2003-05-11 18:50:00	0.4	9.75	0.12	0.09	0.244	0.329861	0.139985	12167.7	0.822783
2003-05-14 05:40:00	2003-05-14 15:35:00	0.39	9.91667	0.2	0.11	0.388	2.45139	-0.411774	11863.5	1.37131
2003-05-19 07:50:00	2003-05-19 14:00:00	0.17	6.16667	0.2	0.14	0.206	4.67708	-0.998919	5171.29	1.37131
2003-05-19 21:30:00	2003-05-20 02:50:00	0.27	5.33333	0.48	0.25	0.797	0.3125	-0.866358	8213.23	3.29113
2003-05-30 16:55:00	2003-05-30 17:30:00	0.26	0.583333	0.68	0	1.102	10.5868	-0.330079	7909.03	4.66244
2003-06-06 11:35:00	2003-06-06 19:35:00	0.23	8	0.2	0.14	0.271	6.75347	-0.738592	6996.45	1.37131
2003-06-08 02:25:00	2003-06-08 21:15:00	0.37	18.8333	0.28	0.1	0.359	1.28472	-0.638508	11255.2	1.91983
2003-06-24 07:00:00	2003-06-24 08:20:00	0.18	1.33333	0.44	0.17	0.319	15.4062	0.208018	5475.48	3.01687
2003-06-25 15:10:00	2003-06-25 23:00:00	0.19	7.83333	0.28	0.12	0.231	1.28472	-0.904723	5779.68	1.91983
2003-06-27 20:10:00	2003-06-28 17:25:00	0.97	21.25	0.4	0.24	1.991	1.88194	0.196189	29506.8	2.74261
2003-07-04 05:40:00	2003-07-04 07:05:00	0.16	1.41667	0.2	0.12	0.174	5.51042	0.305171	4867.1	1.37131
2003-07-05 03:15:00	2003-07-05 05:20:00	0.28	2.08333	0.24	0.19	0.444	0.840278	0.935412	8517.42	1.64557
2003-07-06 07:10:00	2003-07-06 14:30:00	0.7	7.33333	2.2	0.6	7.88	1.07639	0.695399	21293.5	15.0844
2003-07-07 04:35:00	2003-07-07 07:20:00	0.31	2.75	0.64	0.26	0.912	0.586806	-0.123073	9430	4.38818
2003-07-08 09:15:00	2003-07-08 11:05:00	0.17	1.83333	0.2	0.12	0.173	1.07986	-0.968174	5171.29	1.37131
2003-07-15 01:30:00	2003-07-15 02:50:00	1.25	1.33333	1.68	1.18	17.73	6.60069	-0.990085	38024.2	11.519
2003-07-20 23:35:00	2003-07-21 03:35:00	0.22	4	0.56	0.15	0.517	5.86458	-0.975434	6692.26	3.83965
2003-08-20 20:15:00	2003-08-20 21:55:00	0.15	1.66667	0.28	0.09	0.145	30.6944	-0.71307	4562.9	1.91983
2003-08-28 23:00:00	2003-08-29 02:05:00	0.18	3.08333	0.44	0.17	0.401	8.04514	-0.49369	5475.48	3.01687
2003-09-12 11:55:00	2003-09-14 10:30:00	3.71	46.5833	0.84	0.51	15.223	14.4097	0.99336	112856	5.75948
2003-10-11 19:50:00	2003-10-11 22:10:00	0.21	2.33333	0.16	0.12	0.188	27.3889	-0.589605	6388.06	1.09704
2003-10-13 20:30:00	2003-10-14 08:10:00	0.67	11.6667	0.24	0.17	0.843	1.93056	0.984971	20381	1.64557
2003-10-24 15:25:00	2003-10-24 20:35:00	0.49	5.16667	0.32	0.27	0.938	10.3021	-0.371819	14905.5	2.19409
2003-11-01 19:25:00	2003-11-02 06:35:00	0.65	11.1667	0.36	0.19	1.316	7.95139	0.99767	19772.6	2.46835
2003-11-03 13:40:00	2003-11-04 08:35:00	2.83	18.9167	1.24	0.89	23.755	1.29514	-0.12104	86086.8	8.50209
2003-11-17 19:15:00	2003-11-18 09:20:00	0.36	14.0833	0.16	0.1	0.271	13.4444	-0.976589	10951	1.09704
2003-11-22 20:00:00	2003-11-23 10:40:00	2.1	14.6667	0.88	0.56	12.085	4.44444	-0.510418	63880.6	6.03374
2004-03-01 14:55:00	2004-03-01 20:45:00	0.22	5.83333	0.48	0.14	0.457	0.503472	0.205623	6692.26	3.29113
2004-03-04 17:40:00	2004-03-05 10:15:00	1.26	16.5833	0.32	0.27	2.515	2.87153	-0.231977	38328.4	2.19409
2004-03-17 11:00:00	2004-03-17 11:50:00	0.13	0.833333	0.2	0	0.154	12.0312	-0.0781777	3954.52	1.37131
2004-03-24 01:05:00	2004-03-24 05:25:00	0.21	4.33333	0.12	0.08	0.154	6.55208	0.22346	6388.06	0.822783
2004-03-25 20:40:00	2004-03-26 03:25:00	0.88	6.75	0.68	0.47	3.94	1.63542	0.891324	26769	4.66244
2004-03-28 12:10:00	2004-03-28 19:00:00	0.31	6.83333	0.2	0.11	0.31	2.36458	-0.999682	9430	1.37131
2004-04-16 23:40:00	2004-04-17 05:00:00	0.62	5.33333	0.64	0.31	1.653	19.1944	-0.822849	18860	4.38818
2004-04-20 14:50:00	2004-04-20 21:40:00	0.55	6.83333	0.32	0.19	0.809	3.40972	0.458276	16730.6	2.19409
2004-04-24 19:20:00	2004-04-25 12:30:00	0.33	17.1667	0.08	0.06	0.161	3.90278	0.539508	10038.4	0.548522
2004-05-08 20:20:00	2004-05-09 01:10:00	0.44	4.83333	0.96	0.28	1.871	13.3264	0.889589	13384.5	6.58226
2004-05-10 02:15:00	2004-05-10 15:10:00	0.46	12.9167	0.44	0.18	0.924	1.04514	-0.149521	13992.9	3.01687
2004-05-13 11:00:00	2004-05-13 16:05:00	0.3	5.08333	0.28	0.13	0.375	2.82639	0.36448	9125.81	1.91983
2004-05-14 05:40:00	2004-05-14 11:55:00	0.31	6.25	0.08	0.07	0.152	0.565972	0.913112	9430	0.548522
2004-05-17 20:00:00	2004-05-18 04:35:00	0.46	8.58333	0.84	0.39	2.274	3.33681	-0.999363	13992.9	5.75948
2004-05-21 07:25:00	2004-05-21 08:45:00	0.66	1.33333	1.56	0.61	5.452	3.11806	0.932404	20076.8	10.6962
2004-05-21 16:05:00	2004-05-22 07:20:00	3.5	15.25	2.08	1.11	41.637	0.305556	0.744575	106468	14.2616
2004-05-22 18:00:00	2004-05-23 06:55:00	1.74	12.9167	2.36	0.78	19.923	0.444444	-0.237667	52929.7	16.1814
2004-05-25 00:40:00	2004-05-25 02:30:00	0.13	1.83333	0.2	0.12	0.157	1.73958	-0.584165	3954.52	1.37131
2004-05-29 07:50:00	2004-05-29 11:40:00	0.46	3.83333	0.28	0.18	0.674	4.22222	-0.508263	13992.9	1.91983
2004-05-30 08:00:00	2004-05-30 10:50:00	0.69	2.83333	1	0.48	3.565	0.847222	-0.999529	20989.4	6.85653
2004-05-31 04:35:00	2004-05-31 20:10:00	0.31	15.5833	0.24	0.11	0.244	0.739583	-0.67712	9430	1.64557
2004-06-09 13:25:00	2004-06-09 14:55:00	0.21	1.5	0.36	0.15	0.362	8.71875	0.717749	6388.06	2.46835
2004-06-09 21:45:00	2004-06-11 07:25:00	1.43	33.6667	0.48	0.38	4.582	0.284722	0.437973	43499.7	3.29113
2004-06-12 00:10:00	2004-06-12 02:05:00	0.39	1.91667	0.84	0.37	1.533	0.697917	-0.997071	11863.5	5.75948
2004-06-16 20:40:00	2004-06-17 04:30:00	0.72	7.83333	0.96	0.49	4.152	4.77431	-0.216603	21901.9	6.58226
2004-06-21 09:45:00	2004-06-21 12:50:00	0.18	3.08333	0.12	0.08	0.088	4.21875	0.998696	5475.48	0.822783
2004-06-23 20:20:00	2004-06-23 20:45:00	0.14	0.416667	0.44	0	0.6	2.3125	-0.796364	4258.71	3.01687
2004-06-24 06:30:00	2004-06-24 11:45:00	0.34	5.25	0.28	0.14	0.445	0.40625	-0.974587	10342.6	1.91983
2004-07-03 14:55:00	2004-07-04 06:05:00	1.62	15.1667	1.92	0.85	17.212	9.13194	0.955334	49279.4	13.1645
2004-07-06 19:55:00	2004-07-06 22:45:00	0.18	2.83333	0.44	0.11	0.305	2.57639	-0.972916	5475.48	3.01687
2004-07-09 11:45:00	2004-07-09 12:50:00	0.21	1.08333	0.44	0.2	0.512	2.54167	0.755002	6388.06	3.01687
2004-07-16 10:15:00	2004-07-16 17:20:00	0.83	7.08333	1.68	0.51	7.23	6.89236	0.998151	25248.1	11.519
2004-07-21 08:05:00	2004-07-21 10:35:00	0.31	2.5	0.28	0.16	0.415	4.61458	0.136085	9430	1.91983
2004-07-29 14:10:00	2004-07-29 16:10:00	0.33	2	0.6	0.29	1.173	8.14931	0.859759	10038.4	4.11392
2004-07-30 02:55:00	2004-07-30 12:30:00	0.55	9.58333	0.64	0.41	2.411	0.447917	0.482535	16730.6	4.38818
2004-08-01 06:30:00	2004-08-01 08:50:00	0.13	2.33333	0.08	0.07	0.064	1.75	-0.997192	3954.52	0.548522
2004-08-02 10:35:00	2004-08-02 13:00:00	0.16	2.41667	0.12	0.1	0.117	1.07292	-0.319968	4867.1	0.822783
2004-08-03 18:05:00	2004-08-03 22:25:00	1.59	4.33333	0.56	0.51	6.697	1.21181	0.834268	48366.8	3.83965
2004-08-18 17:40:00	2004-08-19 02:35:00	0.39	8.91667	0.16	0.12	0.337	14.8021	-0.258511	11863.5	1.09704
2004-08-24 11:45:00	2004-08-24 21:50:00	0.14	10.0833	0.04	0.04	0.034	5.38194	0.265028	4258.71	0.274261
2004-08-28 16:00:00	2004-08-28 18:00:00	0.14	2	0.24	0.11	0.166	3.75694	0.694164	4258.71	1.64557
2004-09-01 04:15:00	2004-09-01 07:20:00	0.23	3.08333	0.28	0.14	0.265	3.42708	-0.90699	6996.45	1.91983
2004-09-06 02:55:00	2004-09-06 06:50:00	0.11	3.91667	0.32	0.09	0.128	4.81597	0.201275	3346.13	2.19409
2004-09-15 09:25:00	2004-09-15 15:40:00	0.43	6.25	0.36	0.18	0.877	9.10764	-0.349094	13080.3	2.46835
2004-10-01 16:15:00	2004-10-01 22:15:00	0.6	6	1.08	0.38	3.014	16.0243	-0.218381	18251.6	7.40505
2004-10-08	2004-10-08 06:05:00	0.67	6.08333	0.76	0.38	2.569	6.07292	-0.256971	20381	5.21096
2004-10-19 01:05:00	2004-10-19 06:05:00	0.19	5	0.12	0.09	0.116	10.7917	0.952501	5779.68	0.822783
2004-10-22 17:05:00	2004-10-23 09:15:00	0.8	16.1667	0.36	0.25	1.597	3.45833	-0.67153	24335.5	2.46835
2004-10-26 13:30:00	2004-10-26 20:05:00	0.16	6.58333	0.08	0.05	0.059	3.17708	0.027166	4867.1	0.548522
2004-10-29 22:35:00	2004-10-29 23:40:00	0.23	1.08333	0.52	0.22	0.589	3.10417	0.208177	6996.45	3.56539
2004-11-01 09:10:00	2004-11-02 03:05:00	0.41	17.9167	0.12	0.05	0.2	2.39583	0.471429	12471.9	0.822783
2004-11-04 01:45:00	2004-11-04 07:40:00	0.13	5.91667	0.08	0.07	0.064	1.94444	-0.80846	3954.52	0.548522
2004-11-18 20:55:00	2004-11-20 00:35:00	0.3	27.6667	0.08	0.04	0.11	14.5521	0.961032	9125.81	0.548522
2004-11-26 22:40:00	2004-11-27 17:20:00	0.44	18.6667	0.12	0.08	0.215	6.92014	0.0611133	13384.5	0.822783
2005-03-07 01:20:00	2005-03-07 02:05:00	0.12	0.75	0.24	0	0.143	12.4444	0.462671	3650.32	1.64557
2005-03-18 11:45:00	2005-03-18 12:55:00	0.16	1.16667	0.24	0.15	0.237	11.4028	0.999095	4867.1	1.64557
2005-03-20 08:20:00	2005-03-20 10:45:00	0.16	2.41667	0.2	0.14	0.166	1.80903	-0.241868	4867.1	1.37131
2005-03-30 14:00:00	2005-03-30 18:25:00	0.8	4.41667	1.8	0.51	7.346	10.1354	0.870208	24335.5	12.3417
2005-04-06 19:20:00	2005-04-07 00:55:00	1.29	5.58333	2.84	1.19	26.017	7.03819	0.911506	39241	19.4725
2005-04-12 06:20:00	2005-04-12 14:50:00	0.37	8.5	0.24	0.15	0.474	5.22569	0.920676	11255.2	1.64557
2005-04-19 22:55:00	2005-04-20 00:45:00	0.18	1.83333	0.32	0.14	0.235	7.33681	0.534568	5475.48	2.19409
2005-04-25 18:05:00	2005-04-26 01:30:00	0.11	7.41667	0.16	0.08	0.069	5.72222	0.866711	3346.13	1.09704
2005-05-06 05:55:00	2005-05-06 09:45:00	0.34	3.83333	0.48	0.25	0.91	10.184	0.0197053	10342.6	3.29113
2005-05-11 03:15:00	2005-05-11 10:30:00	1.04	7.25	0.84	0.38	4.351	4.72917	-0.980813	31636.1	5.75948
2005-05-13 01:20:00	2005-05-13 06:45:00	0.39	5.41667	0.4	0.26	0.936	1.61806	0.518888	11863.5	2.74261
2005-05-18 21:50:00	2005-05-19 03:30:00	0.51	5.66667	0.36	0.22	1.044	5.62847	0.116267	15513.9	2.46835
2005-05-27 02:00:00	2005-05-27 05:20:00	0.1	3.33333	0.28	0.09	0.131	4.85417	0.906381	3041.94	1.91983
2005-06-05 01:10:00	2005-06-05 04:35:00	0.26	3.41667	0.32	0.16	0.38	8.82639	-0.999728	7909.03	2.19409
2005-06-09 17:30:00	2005-06-09 17:50:00	0.39	0.333333	1.52	0	1	4.53819	0.0551457	11863.5	10.4219
2005-06-13 12:55:00	2005-06-13 14:20:00	0.14	1.41667	0.52	0.13	0.314	3.79514	0.57472	4258.71	3.56539
2005-06-24 18:55:00	2005-06-25 05:05:00	0.26	10.1667	0.16	0.08	0.163	11.191	-0.647355	7909.03	1.09704
2005-06-25 20:55:00	2005-06-26 02:20:00	0.39	5.41667	0.24	0.17	0.498	0.659722	0.3702	11863.5	1.64557
2005-07-12 22:45:00	2005-07-13 01:05:00	0.39	2.33333	0.88	0.22	1.399	16.8507	-0.984402	11863.5	6.03374
2005-07-20 09:35:00	2005-07-20 11:30:00	0.58	1.91667	1.08	0.56	5.168	7.35417	-0.223827	17643.2	7.40505
2005-07-21 08:55:00	2005-07-21 12:50:00	0.86	3.91667	2.08	0.74	11.138	0.892361	0.679061	26160.6	14.2616
2005-07-23 10:50:00	2005-07-23 15:30:00	0.26	4.66667	0.44	0.14	0.509	1.91667	0.310053	7909.03	3.01687
2005-07-25 00:50:00	2005-07-25 05:20:00	0.39	4.5	1.12	0.37	2.39	1.38889	-0.954532	11863.5	7.67931
2005-07-25 15:00:00	2005-07-26 02:40:00	0.94	11.6667	1.12	0.4	5.629	0.402778	-0.958937	28594.2	7.67931
2005-08-11 19:20:00	2005-08-11 23:50:00	0.16	4.5	0.24	0.14	0.19	16.6944	-0.188232	4867.1	1.64557
2005-08-18 06:40:00	2005-08-18 10:30:00	0.27	3.83333	0.16	0.11	0.239	6.28472	-0.369433	8213.23	1.09704
2005-08-18 17:50:00	2005-08-18 18:30:00	0.13	0.666667	0.32	0	0.219	0.305556	-0.747092	3954.52	2.19409
2005-09-13 16:20:00	2005-09-13 16:55:00	0.18	0.583333	0.52	0	0.509	25.9097	-0.996988	5475.48	3.56539
2005-09-19 05:10:00	2005-09-19 07:25:00	0.35	2.25	0.52	0.19	0.837	5.51042	-0.78331	10646.8	3.56539
2005-09-22 02:55:00	2005-09-22 04:00:00	0.11	1.08333	0.24	0.1	0.107	2.8125	0.616768	3346.13	1.64557
2005-09-25 09:10:00	2005-09-25 13:00:00	0.58	3.83333	0.56	0.26	1.941	3.21528	-0.705731	17643.2	3.83965
2005-09-25 19:50:00	2005-09-25 21:35:00	0.17	1.75	0.16	0.11	0.129	0.284722	-0.941784	5171.29	1.09704
2005-09-28 12:55:00	2005-09-28 16:30:00	0.24	3.58333	0.2	0.13	0.244	2.63889	0.716039	7300.65	1.37131
2005-10-05 19:20:00	2005-10-06 01:30:00	0.29	6.16667	0.4	0.21	0.555	7.11806	0.977719	8821.61	2.74261
2005-10-17 06:15:00	2005-10-17 09:40:00	0.13	3.41667	0.12	0.08	0.081	11.1979	0.621595	3954.52	0.822783
2005-11-05 12:45:00	2005-11-06 08:05:00	1.45	19.3333	0.68	0.25	3.998	19.1285	0.887575	44108.1	4.66244
2005-11-12 16:25:00	2005-11-12 21:50:00	0.11	5.41667	0.24	0.08	0.108	6.34722	0.924585	3346.13	1.64557
2005-11-15 13:05:00	2005-11-15 19:20:00	0.54	6.25	0.2	0.17	0.688	2.63542	-0.993915	16426.5	1.37131
2005-11-18 13:10:00	2005-11-18 15:45:00	0.12	2.58333	0.12	0.07	0.073	2.74306	0.999615	3650.32	0.822783
2005-11-27 02:00:00	2005-11-28 12:45:00	0.74	34.75	0.28	0.19	1.159	8.42708	-0.607564	22510.3	1.91983
2006-03-06 14:10:00	2006-03-06 17:45:00	0.19	3.58333	0.12	0.09	0.116	36.2292	0.362576	5779.68	0.822783
2006-03-07 09:30:00	2006-03-07 11:25:00	0.12	1.91667	0.16	0.1	0.124	0.65625	-0.420979	3650.32	1.09704
2006-03-08 17:45:00	2006-03-08 22:30:00	0.65	4.75	0.36	0.29	1.534	1.26389	-0.978553	19772.6	2.46835
2006-03-12 16:00:00	2006-03-13 03:45:00	0.48	11.75	0.2	0.19	0.623	3.72917	0.546205	14601.3	1.37131
2006-03-30 22:05:00	2006-03-31 02:05:00	0.14	4	0.12	0.06	0.068	17.7639	0.922269	4258.71	0.822783
2006-04-02 10:50:00	2006-04-03 06:25:00	1.06	19.5833	0.32	0.21	1.661	2.36458	-0.977304	32244.5	2.19409
2006-04-06 18:15:00	2006-04-07 07:50:00	0.68	13.5833	0.32	0.16	1.365	3.49306	0.578443	20685.2	2.19409
2006-04-12 05:20:00	2006-04-12 08:00:00	0.21	2.66667	0.2	0.14	0.277	4.89583	0.991222	6388.06	1.37131
2006-04-16 02:10:00	2006-04-16 16:35:00	0.86	14.4167	1.12	0.41	4.274	3.75694	-0.653149	26160.6	7.67931
2006-04-22 01:10:00	2006-04-22 01:40:00	0.11	0.5	0.36	0	0.18	5.35764	-0.860672	3346.13	2.46835
2007-03-01 14:05:00	2007-03-01 18:25:00	0.16	4.33333	0.36	0.13	0.3	2.92014	-0.99623	4867.1	2.46835
2007-03-09 15:55:00	2007-03-09 18:15:00	0.11	2.33333	0.2	0.07	0.089	7.89583	0.135131	3346.13	1.37131
2007-03-22 01:10:00	2007-03-22 03:40:00	0.46	2.5	0.8	0.38	1.981	12.2882	-0.0453929	13992.9	5.48522
2007-03-31 08:55:00	2007-04-01 00:40:00	0.84	15.75	0.64	0.42	3.021	9.21875	0.146738	25552.3	4.38818
2007-04-03	2007-04-03 09:45:00	1.15	9.75	0.44	0.28	2.79	1.97222	-0.613425	34982.3	3.01687
2007-04-12 13:40:00	2007-04-12 15:30:00	0.31	1.83333	0.28	0.22	0.514	9.16319	0.493165	9430	1.91983
2007-04-22 20:10:00	2007-04-23 05:40:00	0.57	9.5	0.44	0.2	1.172	10.1944	0.324357	17339	3.01687
2007-04-24 13:15:00	2007-04-25 04:45:00	0.79	15.5	0.12	0.12	0.579	1.31597	0.89096	24031.3	0.822783
2007-04-25 20:15:00	2007-04-27 02:20:00	0.59	30.0833	0.2	0.12	0.51	0.645833	-0.19103	17947.4	1.37131
2007-05-13 05:55:00	2007-05-13 10:00:00	0.37	4.08333	0.2	0.14	0.375	16.1493	0.950415	11255.2	1.37131
2007-05-15 09:55:00	2007-05-15 20:55:00	0.43	11	0.4	0.18	0.729	1.99653	-0.790791	13080.3	2.74261
2007-05-24 16:00:00	2007-05-24 19:05:00	0.2	3.08333	0.36	0.13	0.282	8.79514	0.674874	6083.87	2.46835
2007-06-01 16:30:00	2007-06-01 18:35:00	0.31	2.08333	0.88	0.24	1.2	7.89236	0.615603	9430	6.03374
2007-06-02 06:55:00	2007-06-02 12:15:00	0.32	5.33333	0.6	0.26	0.912	0.513889	0.0624156	9734.19	4.11392
2007-06-03 16:15:00	2007-06-04 09:40:00	5.32	17.4167	5.36	2.15	131.332	1.16667	-0.970291	161831	36.751
2007-06-18 15:50:00	2007-06-19 02:55:00	0.33	11.0833	0.28	0.19	0.601	14.2569	0.565557	10038.4	1.91983
2007-06-21 12:35:00	2007-06-21 23:30:00	0.96	10.9167	1.16	0.62	7.792	2.40278	-0.318455	29202.6	7.95357
2007-07-03 15:45:00	2007-07-03 23:55:00	0.41	8.16667	0.4	0.26	0.915	11.6771	0.110104	12471.9	2.74261
2007-07-09 10:00:00	2007-07-09 10:15:00	0.14	0.25	0.56	0	0.5	5.42014	0.591643	4258.71	3.83965
2007-07-26 23:00:00	2007-07-27 07:00:00	1.11	8	1.56	0.88	12.153	17.5312	0.932259	33765.5	10.6962
2007-08-04 13:35:00	2007-08-05 06:40:00	1.85	17.0833	0.44	0.29	4.178	8.27431	-0.374139	56275.8	3.01687
2007-08-07 02:55:00	2007-08-07 09:50:00	0.33	6.91667	0.24	0.14	0.377	1.84375	-0.201186	10038.4	1.64557
2007-08-09 03:55:00	2007-08-09 08:05:00	0.32	4.16667	0.52	0.23	0.954	1.75347	0.964222	9734.19	3.56539
2007-08-12 00:55:00	2007-08-12 02:05:00	0.34	1.16667	0.96	0.33	1.721	2.70139	-0.999999	10342.6	6.58226
2007-08-14 02:10:00	2007-08-14 09:05:00	1.23	6.91667	1.68	0.69	12.59	2.00347	0.464435	37415.8	11.519
2007-08-15 07:20:00	2007-08-15 13:10:00	0.42	5.83333	0.24	0.12	0.496	0.927083	0.991886	12776.1	1.64557
2007-08-18 09:15:00	2007-08-19 12:05:00	3.53	26.8333	1.36	0.57	24.664	2.83681	-0.99784	107380	9.32487
2007-08-19 18:55:00	2007-08-20 03:55:00	0.57	9	0.6	0.19	1.552	0.284722	-0.102094	17339	4.11392
2007-08-22 01:20:00	2007-08-22 03:50:00	0.32	2.5	0.48	0.15	0.603	1.89236	0.828545	9734.19	3.29113
2007-08-22 15:15:00	2007-08-22 20:40:00	1.29	5.41667	2	0.93	21.232	0.475694	0.386324	39241	13.7131
2007-08-23 04:20:00	2007-08-23 08:25:00	0.21	4.08333	0.4	0.15	0.425	0.319444	-0.147951	6388.06	2.74261
2007-08-23 14:25:00	2007-08-23 17:55:00	0.12	3.5	0.2	0.1	0.109	0.25	-0.538482	3650.32	1.37131
2007-08-24 03:05:00	2007-08-24 04:30:00	0.54	1.41667	1	0.53	4.11	0.381944	-0.889574	16426.5	6.85653
2007-08-24 15:55:00	2007-08-24 16:30:00	0.27	0.583333	0.64	0	1.152	0.475694	-0.99818	8213.23	4.38818
2007-08-27 08:45:00	2007-08-27 11:30:00	0.55	2.75	0.48	0.28	1.21	2.67708	0.928715	16730.6	3.29113
2007-09-06 19:25:00	2007-09-07 04:10:00	0.15	8.75	0.12	0.07	0.092	10.3299	-0.802214	4562.9	0.822783
2007-09-07 10:40:00	2007-09-07 10:55:00	0.11	0.25	0.44	0	0.4	0.270833	-0.291293	3346.13	3.01687
2007-09-10 06:50:00	2007-09-10 17:25:00	0.86	10.5833	0.32	0.23	1.563	2.82986	0.562076	26160.6	2.19409
2007-09-21 19:05:00	2007-09-21 21:45:00	0.73	2.66667	1.96	0.58	6.846	11.0694	0.996636	22206.1	13.4388
2007-09-25 13:00:00	2007-09-26 00:15:00	0.15	11.25	0.08	0.06	0.073	3.63542	-0.866383	4562.9	0.548522
2007-10-01 07:05:00	2007-10-01 13:10:00	0.68	6.08333	1	0.59	4.978	5.28472	-0.999977	20685.2	6.85653
2007-10-02 17:20:00	2007-10-03 14:45:00	0.43	21.4167	0.12	0.09	0.263	1.17361	-0.149974	13080.3	0.822783
2007-10-16 15:05:00	2007-10-17 12:45:00	0.53	21.6667	0.08	0.06	0.194	13.0139	0.928123	16122.3	0.548522
2007-10-18 03:35:00	2007-10-19 10:35:00	0.94	31	0.12	0.09	0.575	0.618056	0.418163	28594.2	0.822783
2008-03-22 08:50:00	2008-03-22 14:10:00	0.12	5.33333	0.24	0.1	0.143	154.927	0.961471	3650.32	1.64557
2008-03-31 02:15:00	2008-04-01 00:30:00	0.92	22.25	0.52	0.31	3.062	8.50347	-0.912847	27985.8	3.56539
2008-04-03 18:35:00	2008-04-03 23:15:00	0.19	4.66667	0.12	0.08	0.116	2.75347	0.993002	5779.68	0.822783
2008-04-06 21:15:00	2008-04-07 00:45:00	0.11	3.5	0.12	0.08	0.055	2.91667	-0.99614	3346.13	0.822783
2008-04-08 12:30:00	2008-04-09 06:15:00	1.1	17.75	0.24	0.19	1.396	1.48958	0.151919	33461.3	1.64557
2008-04-10 08:30:00	2008-04-11 04:00:00	2.47	19.5	1.76	0.72	23.39	1.09375	0.915097	75135.8	12.0675
2008-04-11 16:55:00	2008-04-12 07:50:00	0.13	14.9167	0.04	0.03	0.032	0.538194	-0.193713	3954.52	0.274261
2008-04-17 21:10:00	2008-04-18 04:40:00	0.41	7.5	0.2	0.17	0.533	5.55556	-0.0887263	12471.9	1.37131
2008-04-18 15:35:00	2008-04-18 22:20:00	0.38	6.75	0.4	0.21	0.684	0.454861	-0.755361	11559.4	2.74261
2008-04-24 14:45:00	2008-04-25 16:00:00	2.19	25.25	1.64	1	20.371	5.68403	-0.512674	66618.4	11.2447
2008-05-02 03:20:00	2008-05-02 03:50:00	0.21	0.5	0.76	0	0.811	6.47222	-0.978318	6388.06	5.21096
2008-05-02 10:15:00	2008-05-02 11:05:00	0.22	0.833333	0.56	0	0.558	0.267361	-0.879105	6692.26	3.83965
2008-05-06 23:40:00	2008-05-07 07:15:00	0.29	7.58333	0.24	0.23	0.478	4.52431	-0.336741	8821.61	1.64557
2008-05-10 23:45:00	2008-05-11 10:55:00	0.22	11.1667	0.08	0.05	0.081	3.6875	0.933958	6692.26	0.548522
2008-05-25 19:35:00	2008-05-25 21:25:00	0.41	1.83333	0.56	0.33	1.328	14.3611	-0.318133	12471.9	3.83965
2008-05-29 12:55:00	2008-05-30 08:45:00	1.18	19.8333	0.84	0.38	4.562	3.64583	0.786047	35894.8	5.75948
2008-06-02 17:45:00	2008-06-03 01:00:00	0.24	7.25	0.48	0.14	0.447	3.375	-0.923615	7300.65	3.29113
2008-06-05 03:35:00	2008-06-05 08:30:00	1.31	4.91667	2.52	0.81	16.504	2.10764	0.94326	39849.4	17.2784
2008-06-07 16:50:00	2008-06-09 07:50:00	4.15	39	3.04	1.48	85.556	2.34722	-0.599443	126240	20.8438
2008-06-12 10:05:00	2008-06-13 04:05:00	1.59	18	1.04	0.33	7.659	3.09375	0.796588	48366.8	7.13079
2008-06-14 16:00:00	2008-06-14 22:55:00	0.32	6.91667	0.76	0.2	1.107	1.49653	-0.969919	9734.19	5.21096
2008-07-06 22:15:00	2008-07-07 07:20:00	0.27	9.08333	0.72	0.21	0.852	21.9722	0.999727	8213.23	4.9367
2008-07-07 19:45:00	2008-07-08	1.64	4.25	2.44	1.2	26.325	0.517361	0.606454	49887.7	16.7299
2008-07-10 17:20:00	2008-07-10 18:25:00	0.17	1.08333	0.48	0.16	0.376	2.72222	-0.779508	5171.29	3.29113
2008-07-11 00:45:00	2008-07-11 10:25:00	2.85	9.66667	2.4	1.03	46.641	0.263889	-0.552077	86695.2	16.4557
2008-07-12 02:20:00	2008-07-12 05:25:00	0.35	3.08333	0.72	0.21	1.069	0.663194	0.462772	10646.8	4.9367
2008-07-19 23:20:00	2008-07-20 00:35:00	0.18	1.25	0.24	0.15	0.209	7.74653	0.876556	5475.48	1.64557
2008-07-29 20:20:00	2008-07-30 02:40:00	0.32	6.33333	1.2	0.31	1.884	9.82292	-0.579762	9734.19	8.22783
2008-08-04 04:50:00	2008-08-04 05:55:00	0.74	1.08333	1.76	0.73	8.104	5.09028	-0.999728	22510.3	12.0675
2008-08-13 10:50:00	2008-08-13 13:35:00	0.11	2.75	0.2	0.06	0.088	9.20486	0.988555	3346.13	1.37131
2008-08-28 04:20:00	2008-08-28 06:55:00	0.11	2.58333	0.16	0.05	0.069	14.6146	-0.426449	3346.13	1.09704
2008-08-28 20:10:00	2008-08-28 21:05:00	0.11	0.916667	0.36	0	0.164	0.552083	-0.891337	3346.13	2.46835
2008-09-03 04:10:00	2008-09-03 04:50:00	0.14	0.666667	0.28	0	0.265	5.29514	-0.149866	4258.71	1.91983
2008-09-04 01:10:00	2008-09-04 19:15:00	1.02	18.0833	0.2	0.14	0.893	0.847222	-0.854939	31027.7	1.37131
2008-09-08 09:05:00	2008-09-08 14:15:00	0.13	5.16667	0.04	0.03	0.032	3.57639	0.800357	3954.52	0.274261
2008-09-12 21:05:00	2008-09-13 14:55:00	0.9	17.8333	0.16	0.13	0.773	4.28472	0.41734	27377.4	1.09704
2008-10-07 20:05:00	2008-10-08 23:20:00	1	27.25	0.12	0.09	0.611	24.2153	0.253318	30419.4	0.822783
2008-10-15 04:25:00	2008-10-16 07:15:00	0.33	26.8333	0.04	0.03	0.081	6.21181	0.968751	10038.4	0.274261
2008-10-23 18:20:00	2008-10-24 07:05:00	0.3	12.75	0.12	0.08	0.183	7.46181	-0.457541	9125.81	0.822783
2008-10-24 19:00:00	2008-10-24 20:35:00	0.14	1.58333	0.16	0.11	0.125	0.496528	-0.997703	4258.71	1.09704
2008-11-06 07:45:00	2008-11-06 13:50:00	0.28	6.08333	0.44	0.18	0.638	12.4653	-0.994709	8517.42	3.01687
2008-11-11 13:25:00	2008-11-11 23:55:00	0.17	10.5	0.12	0.05	0.085	4.98264	-0.408501	5171.29	0.822783
2008-11-13 18:00:00	2008-11-13 22:50:00	0.33	4.83333	0.12	0.1	0.202	1.75347	-0.505369	10038.4	0.822783
2009-03-07 04:55:00	2009-03-07 15:35:00	0.97	10.6667	0.36	0.22	1.786	8.4375	-0.171433	29506.8	2.46835
2009-03-08 07:55:00	2009-03-08 16:50:00	0.84	8.91667	0.28	0.23	1.336	0.680556	0.814993	25552.3	1.91983
2009-03-23 01:50:00	2009-03-23 05:40:00	0.16	3.83333	0.16	0.06	0.1	14.375	0.00871894	4867.1	1.09704
2009-03-24 02:30:00	2009-03-24 22:40:00	1.76	20.1667	0.48	0.33	4.844	0.868056	-0.851615	53538.1	3.29113
2009-03-31 04:10:00	2009-03-31 15:10:00	0.35	11	0.16	0.1	0.305	6.22917	-0.972626	10646.8	1.09704
2009-04-19 15:25:00	2009-04-20 06:30:00	0.65	15.0833	0.2	0.13	0.648	19.0104	-0.657187	19772.6	1.37131
2009-04-20 22:10:00	2009-04-21 11:05:00	0.31	12.9167	0.08	0.05	0.114	0.652778	0.534714	9430	0.548522
2009-04-25 08:05:00	2009-04-26 07:55:00	2.29	23.8333	0.56	0.44	7.21	3.875	-0.965099	69660.3	3.83965
2009-04-30 05:00:00	2009-04-30 09:45:00	0.25	4.75	0.12	0.1	0.186	3.87847	-0.411513	7604.84	0.822783
2009-05-06 18:30:00	2009-05-07 00:05:00	0.42	5.58333	0.64	0.23	1.183	6.36458	-0.646836	12776.1	4.38818
2009-05-08 21:15:00	2009-05-09 08:35:00	1.46	11.3333	1	0.69	11.11	1.88194	-0.317964	44412.3	6.85653
2009-05-13 18:35:00	2009-05-13 21:30:00	0.86	2.91667	1.88	0.54	8.294	4.41667	-0.989203	26160.6	12.8903
2009-05-23 05:15:00	2009-05-23 08:35:00	0.24	3.33333	0.36	0.17	0.394	9.32292	0.991894	7300.65	2.46835
2009-05-26 21:15:00	2009-05-27 13:30:00	0.5	16.25	0.2	0.11	0.499	3.52778	-0.92197	15209.7	1.37131
2009-05-31 23:55:00	2009-06-01 05:00:00	0.14	5.08333	0.28	0.11	0.144	4.43403	-0.71483	4258.71	1.91983
2009-06-07 22:25:00	2009-06-08 07:40:00	1.37	9.25	1.84	1.1	18.276	6.72569	-0.992797	41674.5	12.616
2009-06-12 23:20:00	2009-06-13 06:10:00	0.25	6.83333	0.12	0.1	0.155	4.65278	-0.204258	7604.84	0.822783
2009-06-18 22:55:00	2009-06-19 04:00:00	1.54	5.08333	2.2	1.16	29.761	5.69792	0.094699	46845.8	15.0844
2009-06-19 17:00:00	2009-06-19 22:55:00	0.16	5.91667	0.24	0.08	0.151	0.541667	-0.612035	4867.1	1.64557
2009-07-10 04:55:00	2009-07-10 07:35:00	0.21	2.66667	0.16	0.12	0.182	20.25	-0.74196	6388.06	1.09704
2009-07-11 02:05:00	2009-07-11 04:25:00	0.11	2.33333	0.2	0.06	0.09	0.770833	0.0459386	3346.13	1.37131
2009-07-15 01:35:00	2009-07-15 03:15:00	0.2	1.66667	0.36	0.17	0.363	3.88194	-0.772982	6083.87	2.46835
2009-07-21 13:25:00	2009-07-22 05:00:00	0.66	15.5833	0.4	0.19	1.214	6.42361	-0.888194	20076.8	2.74261
2009-07-24 14:05:00	2009-07-24 20:50:00	0.18	6.75	0.2	0.05	0.124	2.37847	0.830266	5475.48	1.37131
2009-07-30 07:40:00	2009-07-30 10:05:00	0.17	2.41667	0.2	0.09	0.13	5.45139	0.415996	5171.29	1.37131
2009-08-07 11:10:00	2009-08-07 13:50:00	0.23	2.66667	0.24	0.14	0.264	8.04514	0.751219	6996.45	1.64557
2009-08-08 04:55:00	2009-08-08 17:15:00	0.82	12.3333	0.6	0.23	2.06	0.628472	0.1101	24943.9	4.11392
2009-08-19 16:15:00	2009-08-20 07:40:00	0.2	15.4167	0.28	0.08	0.227	10.9583	0.93365	6083.87	1.91983
2009-08-20 15:25:00	2009-08-20 16:55:00	0.17	1.5	0.28	0.16	0.252	0.322917	0.23692	5171.29	1.91983
2009-08-27 04:25:00	2009-08-27 09:30:00	0.2	5.08333	0.12	0.07	0.098	6.47917	-0.019286	6083.87	0.822783
2009-08-28 20:25:00	2009-08-28 20:55:00	0.49	0.5	1.28	0	4.501	1.45486	-0.993377	14905.5	8.77635
2009-09-22 08:00:00	2009-09-22 14:55:00	2.31	6.91667	1.08	0.72	16.758	24.4618	-0.860297	70268.7	7.40505
2009-09-25 08:30:00	2009-09-25 17:00:00	0.13	8.5	0.16	0.1	0.098	2.73264	0.792619	3954.52	1.09704
2009-09-27 17:00:00	2009-09-28 03:20:00	0.67	10.3333	0.92	0.41	3.974	2	-0.12732	20381	6.308
2009-10-01 10:25:00	2009-10-02 05:35:00	0.45	19.1667	0.24	0.16	0.578	3.29514	0.653174	13688.7	1.64557
2009-10-06 04:45:00	2009-10-06 19:10:00	0.31	14.4167	0.28	0.09	0.281	3.96528	-0.722581	9430	1.91983
2009-10-15 02:10:00	2009-10-15 15:25:00	0.2	13.25	0.04	0.04	0.049	8.29167	0.973472	6083.87	0.274261
2009-10-21 23:50:00	2009-10-23 19:55:00	2.06	44.0833	0.28	0.17	3.078	6.35069	0.65965	62663.9	1.91983
2009-10-26 01:45:00	2009-10-26 16:50:00	0.17	15.0833	0.08	0.04	0.062	2.24306	0.216195	5171.29	0.548522
2009-10-29 13:55:00	2009-10-30 07:20:00	1.01	17.4167	0.56	0.43	3.683	2.87847	-0.550754	30723.5	3.83965
2010-03-11 10:10:00	2010-03-11 12:20:00	0.2	2.16667	0.28	0.15	0.293	132.118	-0.995892	6083.87	1.91983
2010-04-05 17:40:00	2010-04-06 08:55:00	1.07	15.25	0.76	0.37	4.019	25.2222	-0.996034	32548.7	5.21096
2010-04-06 20:20:00	2010-04-06 22:50:00	0.34	2.5	0.48	0.2	0.865	0.475694	-0.362172	10342.6	3.29113
2010-04-07 13:44:00	2010-04-08 04:15:00	0.75	14.5167	0.24	0.18	1.427	0.475694		22814.5	1.64557
2010-04-24 01:55:00	2010-04-24 07:40:00	0.41	5.75	0.52	0.23	1.266	15.9028	-0.914422	12471.9	3.56539
2010-04-25 00:40:00	2010-04-25 11:00:00	1.04	10.3333	0.6	0.29	3.086	0.708333	-0.8622	31636.1	4.11392
2010-04-30 15:35:00	2010-05-01 03:00:00	0.53	11.4167	0.52	0.17	1.228	5.19097	-0.991502	16122.3	3.56539
2010-05-07 07:40:00	2010-05-08 06:25:00	0.56	22.75	0.16	0.11	0.482	6.19444	-0.967285	17034.8	1.09704
2010-05-11 02:05:00	2010-05-11 12:55:00	0.76	10.8333	0.2	0.18	0.969	2.81944	0.635405	23118.7	1.37131
2010-05-12 19:55:00	2010-05-13 06:00:00	1.16	10.0833	0.32	0.25	2.354	1.29167	-0.869665	35286.5	2.19409
2010-05-21 01:30:00	2010-05-21 06:45:00	0.25	5.25	0.16	0.12	0.217	7.8125	-0.137182	7604.84	1.09704
2010-05-25 16:35:00	2010-05-25 17:55:00	0.16	1.33333	0.48	0.15	0.34	4.40972	-0.975562	4867.1	3.29113
2010-05-26 18:15:00	2010-05-26 21:30:00	0.73	3.25	1.36	0.58	6.362	1.01389	-0.661551	22206.1	9.32487
2010-06-02 17:05:00	2010-06-02 18:05:00	0.27	1	0.88	0.27	1.126	6.81597	-0.054654	8213.23	6.03374
2010-06-04 04:45:00	2010-06-04 13:10:00	0.41	8.41667	0.24	0.18	0.547	1.44444	0.990304	12471.9	1.64557
2010-06-05 16:00:00	2010-06-05 20:10:00	1.53	4.16667	1.44	0.68	13.075	1.11806	0.239075	46541.6	9.8734
2010-06-06 15:00:00	2010-06-06 15:50:00	0.11	0.833333	0.32	0	0.15	0.784722	-0.657066	3346.13	2.19409
2010-06-08 02:30:00	2010-06-09 03:45:00	0.66	25.25	0.32	0.11	0.689	1.44444	-0.810793	20076.8	2.19409
2010-06-14 09:20:00	2010-06-14 13:55:00	0.18	4.58333	0.12	0.08	0.112	5.23264	-0.809892	5475.48	0.822783
2010-06-15 07:45:00	2010-06-15 16:40:00	0.65	8.91667	0.4	0.21	1.102	0.743056	-0.00994057	19772.6	2.74261
2010-06-18 01:40:00	2010-06-18 04:20:00	0.16	2.66667	0.2	0.09	0.166	2.375	0.394024	4867.1	1.37131
2010-06-21 19:20:00	2010-06-21 22:00:00	0.75	2.66667	2.44	0.72	10.266	3.625	0.18838	22814.5	16.7299
2010-06-23 01:55:00	2010-06-23 05:50:00	1.31	3.91667	2.2	0.82	17.397	1.16319	0.994283	39849.4	15.0844
2010-06-25 23:55:00	2010-06-26 02:35:00	0.74	2.66667	1.2	0.51	4.163	2.75347	-0.945424	22510.3	8.22783
2010-06-27 00:05:00	2010-06-27 08:45:00	0.38	8.66667	0.76	0.24	1.367	0.895833	-0.780682	11559.4	5.21096
2010-07-04 21:55:00	2010-07-05 08:05:00	0.17	10.1667	0.16	0.08	0.148	7.54861	0.667452	5171.29	1.09704
2010-07-05 19:35:00	2010-07-05 20:55:00	0.26	1.33333	0.56	0.25	0.726	0.479167	0.998031	7909.03	3.83965
2010-07-15	2010-07-15 03:55:00	1.25	3.91667	1.88	1.03	16.121	9.12847	-0.984202	38024.2	12.8903
2010-07-18 02:25:00	2010-07-18 04:30:00	0.14	2.08333	0.16	0.1	0.123	2.9375	0.97614	4258.71	1.09704
2010-07-22 06:55:00	2010-07-23 09:05:00	2.67	26.1667	1.52	0.99	29.215	4.10069	-0.677071	81219.7	10.4219
2010-07-24 01:05:00	2010-07-24 08:00:00	0.81	6.91667	0.68	0.32	2.372	0.666667	0.848513	24639.7	4.66244
2010-07-28 03:20:00	2010-07-28 06:40:00	0.11	3.33333	0.12	0.05	0.069	3.80556	-0.923177	3346.13	0.822783
2010-08-08 06:50:00	2010-08-08 11:50:00	1.22	5	2.04	0.85	15.33	11.0069	-0.518238	37111.6	13.9873
2010-08-09 02:25:00	2010-08-09 06:50:00	0.71	4.41667	1.84	0.56	6.306	0.607639	-0.978024	21597.7	12.616
2010-08-13 09:55:00	2010-08-13 19:15:00	1.14	9.33333	0.64	0.3	4.14	4.12847	0.572805	34678.1	4.38818
2010-08-20 17:25:00	2010-08-20 19:45:00	0.22	2.33333	0.28	0.16	0.358	6.92361	-0.407205	6692.26	1.91983
2010-08-31 15:30:00	2010-08-31 16:30:00	0.25	1	0.6	0.25	0.785	10.8229	0.941428	7604.84	4.11392
2010-08-31 23:30:00	2010-09-01 10:40:00	0.85	11.1667	1.4	0.65	7.135	0.291667	0.779274	25856.5	9.59914
2010-09-02 09:45:00	2010-09-02 10:50:00	0.13	1.08333	0.24	0.12	0.126	0.961806	-0.508616	3954.52	1.64557
2010-09-02 17:00:00	2010-09-02 19:40:00	0.3	2.66667	0.52	0.16	0.742	0.256944	-0.741739	9125.81	3.56539
2010-09-11 06:40:00	2010-09-11 07:30:00	0.14	0.833333	0.4	0	0.279	8.45833	-0.0196727	4258.71	2.74261
2010-09-18 03:40:00	2010-09-18 08:50:00	1.27	5.16667	2.28	1.04	16.412	6.84028	0.541433	38632.6	15.6329
2010-09-23 20:50:00	2010-09-24 03:55:00	0.17	7.08333	0.08	0.07	0.083	5.5	0.00423323	5171.29	0.548522
2010-10-23 07:30:00	2010-10-23 11:50:00	0.13	4.33333	0.08	0.06	0.048	29.1493	-0.922437	3954.52	0.548522
2010-10-23 21:50:00	2010-10-24 11:15:00	0.6	13.4167	0.28	0.16	0.854	0.416667	-0.979913	18251.6	1.91983
2010-10-26 01:55:00	2010-10-26 09:05:00	0.93	7.16667	0.56	0.27	2.307	1.61111	0.717434	28290	3.83965
2010-11-12 23:00:00	2010-11-13 10:35:00	0.29	11.5833	0.16	0.1	0.217	17.5799	-0.17014	8821.61	1.09704
2010-11-17 00:55:00	2010-11-17 07:50:00	0.12	6.91667	0.12	0.07	0.073	3.59722	-0.694192	3650.32	0.822783
2010-11-22 06:40:00	2010-11-22 07:40:00	0.11	1	0.12	0.11	0.081	4.95139	0.272803	3346.13	0.822783
2010-11-24 15:35:00	2010-11-25 06:10:00	0.27	14.5833	0.04	0.03	0.066	2.32986	-0.865611	8213.23	0.274261
2011-03-22 04:00:00	2011-03-23 19:05:00	0.59	39.0833	0.08	0.04	0.216	116.91	-0.229986	17947.4	0.548522
2011-03-24 10:30:00	2011-03-24 17:20:00	0.4	6.83333	0.08	0.08	0.196	0.642361	-0.596149	12167.7	0.548522
2011-04-01 10:30:00	2011-04-01 18:10:00	0.21	7.66667	0.04	0.04	0.051	7.71528	0.881069	6388.06	0.274261
2011-04-03 21:35:00	2011-04-04 02:15:00	0.41	4.66667	0.72	0.29	1.458	2.14236	-0.387881	12471.9	4.9367
2011-04-06 05:15:00	2011-04-06 11:55:00	0.12	6.66667	0.04	0.03	0.029	2.125	-0.411243	3650.32	0.274261
2011-04-15 14:55:00	2011-04-18 05:00:00	0.36	62.0833	0.04	0.02	0.044	9.125	0.431195	10951	0.274261
2011-04-19 09:15:00	2011-04-19 18:40:00	0.58	9.41667	0.36	0.28	1.354	1.17708	0.175565	17643.2	2.46835
2011-04-20 08:55:00	2011-04-20 13:40:00	0.37	4.75	0.12	0.12	0.274	0.59375	0.917834	11255.2	0.822783
2011-04-22 07:40:00	2011-04-22 22:15:00	0.42	14.5833	0.24	0.15	0.485	1.75	0.0310807	12776.1	1.64557
2011-04-25 21:30:00	2011-04-26 14:10:00	0.98	16.6667	0.24	0.18	1.513	2.96875	0.392833	29811	1.64557
2011-05-11 13:00:00	2011-05-11 16:30:00	0.22	3.5	0.64	0.16	0.594	14.9514	-0.334977	6692.26	4.38818
2011-05-13 16:15:00	2011-05-14 01:40:00	0.16	9.41667	0.24	0.09	0.166	1.98958	-0.616741	4867.1	1.64557
2011-05-14 18:30:00	2011-05-14 22:25:00	0.14	3.91667	0.16	0.08	0.125	0.701389	0.416102	4258.71	1.09704
2011-05-24 23:30:00	2011-05-25 16:10:00	1.41	16.6667	0.6	0.41	5.127	10.0451	-0.936569	42891.3	4.11392
2011-06-08 19:00:00	2011-06-08 23:25:00	1.21	4.41667	1.84	1.08	16.324	14.1181	0.311952	36807.4	12.616
2011-06-10 01:45:00	2011-06-10 06:25:00	0.26	4.66667	0.28	0.18	0.417	1.09722	0.999616	7909.03	1.91983
2011-06-15 04:55:00	2011-06-15 15:50:00	0.31	10.9167	0.16	0.1	0.274	4.9375	0.432493	9430	1.09704
2011-06-19 04:40:00	2011-06-19 08:05:00	0.95	3.41667	1.84	0.51	9.475	3.53472	-0.962276	28898.4	12.616
2011-06-21 13:25:00	2011-06-21 18:50:00	0.15	5.41667	0.48	0.13	0.293	2.22222	0.49535	4562.9	3.29113
2011-07-11 07:15:00	2011-07-11 08:40:00	0.2	1.41667	0.56	0.18	0.497	19.5174	0.987377	6083.87	3.83965
2011-07-22 06:10:00	2011-07-22 08:10:00	0.19	2	0.16	0.11	0.165	10.8958	-0.198446	5779.68	1.09704
2011-07-27 04:50:00	2011-07-27 14:55:00	0.78	10.0833	1.6	0.6	6.894	4.86111	-0.999479	23727.1	10.9704
2011-07-28 07:35:00	2011-07-28 10:00:00	0.23	2.41667	0.72	0.2	0.735	0.694444	-0.411346	6996.45	4.9367
2011-08-07 05:05:00	2011-08-07 08:50:00	1.03	3.75	2.76	0.97	17.674	9.79514	-0.0471078	31331.9	18.924
2011-08-12 17:40:00	2011-08-12 18:50:00	0.27	1.16667	0.84	0.26	1.187	5.36806	0.653163	8213.23	5.75948
2011-08-13 17:30:00	2011-08-13 18:35:00	0.12	1.08333	0.44	0.11	0.228	0.944444	-0.277606	3650.32	3.01687
2011-08-20 07:05:00	2011-08-20 09:00:00	0.47	1.91667	0.84	0.28	2.043	6.52083	-0.534645	14297.1	5.75948
2011-08-23 07:05:00	2011-08-23 11:30:00	0.47	4.41667	0.48	0.28	1.265	2.92014	0.410038	14297.1	3.29113
2011-08-30 18:00:00	2011-08-31 01:50:00	0.19	7.83333	0.08	0.05	0.093	7.27083	0.999727	5779.68	0.548522
2011-09-02 20:40:00	2011-09-03 20:15:00	0.75	23.5833	1.08	0.45	4.181	2.78472	-0.999975	22814.5	7.40505
2011-09-18 11:30:00	2011-09-19 11:10:00	0.32	23.6667	0.08	0.06	0.156	14.6354	0.995298	9734.19	0.548522
2011-09-25 09:15:00	2011-09-25 18:55:00	0.12	9.66667	0.2	0.06	0.078	5.92014	0.864797	3650.32	1.37131
2011-09-26 02:15:00	2011-09-26 10:05:00	1.2	7.83333	0.68	0.47	5.305	0.305556	0.330103	36503.2	4.66244
2011-09-29 08:40:00	2011-09-29 22:20:00	0.31	13.6667	0.28	0.19	0.541	2.94097	-0.20909	9430	1.91983
2011-10-12 05:50:00	2011-10-12 11:45:00	0.35	5.91667	0.6	0.3	1.216	12.3125	0.104737	10646.8	4.11392
2011-10-12 18:05:00	2011-10-13 12:40:00	0.87	18.5833	0.44	0.18	1.846	0.263889	0.577241	26464.8	3.01687
2011-10-23 20:05:00	2011-10-23 21:25:00	0.18	1.33333	0.56	0.17	0.496	10.309	-0.762838	5475.48	3.83965
2011-11-08 02:50:00	2011-11-08 13:10:00	0.82	10.3333	0.24	0.22	1.313	15.2257	0.962046	24943.9	1.64557
2011-11-08 19:20:00	2011-11-09 09:25:00	1.04	14.0833	0.36	0.25	2.242	0.256944	0.570327	31636.1	2.46835
2011-11-26 08:20:00	2011-11-26 19:55:00	0.26	11.5833	0.08	0.06	0.127	16.9549	0.941414	7909.03	0.548522
2012-03-07 18:40:00	2012-03-08 00:10:00	0.58	5.5	0.44	0.29	1.465	7.61458	0.0152024	17643.2	3.01687
2012-03-12 00:05:00	2012-03-12 13:30:00	0.25	13.4167	0.2	0.07	0.196	3.99653	0.876671	7604.84	1.37131
2012-03-19 11:00:00	2012-03-19 13:00:00	0.15	2	0.12	0.1	0.112	6.89583	0.783959	4562.9	0.822783
2012-03-22 22:25:00	2012-03-23 06:55:00	0.51	8.5	0.92	0.37	2.354	3.39236	-0.537033	15513.9	6.308
2012-03-30 02:15:00	2012-03-30 09:15:00	0.69	7	0.28	0.23	1.121	6.80556	0.304697	20989.4	1.91983
2012-04-14 23:10:00	2012-04-15 05:45:00	0.68	6.58333	0.64	0.34	2.383	15.5799	-0.455724	20685.2	4.38818
2012-04-19 12:50:00	2012-04-20 03:20:00	0.94	14.5	0.52	0.35	2.481	4.29514	0.945964	28594.2	3.56539
2012-04-25 06:45:00	2012-04-25 13:05:00	0.17	6.33333	0.28	0.13	0.229	5.14236	0.978772	5171.29	1.91983
2012-04-28 05:50:00	2012-04-28 12:30:00	0.15	6.66667	0.12	0.09	0.092	2.69792	-0.926346	4562.9	0.822783
2012-04-29 18:45:00	2012-04-30 04:25:00	0.54	9.66667	0.2	0.16	0.619	1.26042	-0.40667	16426.5	1.37131
2012-05-02 02:35:00	2012-05-02 06:40:00	0.55	4.08333	1.36	0.42	3.824	1.92361	0.943821	16730.6	9.32487
2012-05-06 09:30:00	2012-05-06 13:15:00	0.48	3.75	0.68	0.36	2.049	4.11806	-0.0872966	14601.3	4.66244
2012-05-25 19:05:00	2012-05-26 08:30:00	0.64	13.4167	0.56	0.2	1.399	19.2431	0.446045	19468.4	3.83965
2012-05-28 15:30:00	2012-05-28 17:35:00	0.39	2.08333	0.96	0.34	1.703	2.29167	-0.170605	11863.5	6.58226
2012-05-31 00:10:00	2012-05-31 06:25:00	0.45	6.25	0.24	0.2	0.649	2.27431	-0.572079	13688.7	1.64557
2012-06-11 05:25:00	2012-06-11 07:45:00	0.14	2.33333	0.16	0.09	0.107	10.9583	-0.926474	4258.71	1.09704
2012-07-18 04:10:00	2012-07-18 07:10:00	0.28	3	0.76	0.19	0.916	36.8507	-0.420266	8517.42	5.21096
2012-07-18 18:30:00	2012-07-19 02:20:00	0.66	7.83333	0.8	0.39	3.573	0.472222	-0.857793	20076.8	5.48522
2012-07-24 04:00:00	2012-07-24 10:45:00	0.51	6.75	0.64	0.26	1.469	5.06944	-0.143116	15513.9	4.38818
2012-07-25 03:45:00	2012-07-25 05:05:00	0.13	1.33333	0.48	0.12	0.256	0.708333	-0.90577	3954.52	3.29113
2012-07-25 21:45:00	2012-07-26 04:35:00	0.88	6.83333	0.92	0.39	4.291	0.694444	-0.9516	26769	6.308
2012-08-04 15:25:00	2012-08-04 17:00:00	0.19	1.58333	0.2	0.14	0.223	9.45139	0.811706	5779.68	1.37131
2012-08-08 14:05:00	2012-08-08 18:05:00	0.16	4	0.08	0.05	0.078	3.87847	-0.143716	4867.1	0.548522
2012-08-09 13:20:00	2012-08-10 16:00:00	0.38	26.6667	0.08	0.05	0.139	0.802083	0.734232	11559.4	0.548522
2012-08-16 05:25:00	2012-08-16 08:30:00	0.57	3.08333	0.84	0.28	2.327	5.55903	0.93614	17339	5.75948
2012-08-26 06:55:00	2012-08-26 12:40:00	0.2	5.75	0.24	0.1	0.188	9.93403	-0.961493	6083.87	1.64557
2012-09-04 19:50:00	2012-09-04 22:00:00	0.26	2.16667	0.28	0.13	0.325	9.29861	0.924212	7909.03	1.91983
2012-09-05 05:20:00	2012-09-05 06:20:00	0.15	1	0.2	0.15	0.201	0.305556	0.705503	4562.9	1.37131
2012-09-08 19:30:00	2012-09-08 20:30:00	0.12	1	0.2	0.12	0.164	3.54861	-0.328247	3650.32	1.37131
2012-09-21 09:50:00	2012-09-21 12:20:00	0.13	2.5	0.12	0.08	0.079	12.5556	-0.298953	3954.52	0.822783
